# Supplementary material
Source: ML conference proceedings conference paper supplement (https://openaccess.thecvf.com/content/ICCV2021/html/Singh_Factorizing_Perception_and_ICCV_2021_paper.html)
Supplement: Supplementary file 1 [file Singh_Factorizing_Perception_and_ICCV_2021_supplemental.zip]

Archive with 6 entries (6 files):
- 06140-supp.pdf
- fail.mp4
- success_1.mp4
- success_2.mp4
- success_3.mp4
- success_4.mp4
